# Supplementary material
Source: MDPI journal article supplement (https://www.mdpi.com/2073-4344/12/10/1174)
Supplement: s1 [file s1]

# A Mechanistic Study of Methanol Steam Reforming on Ni<sub>2</sub>P Catalyst

Abdulrahman Almithn \* and Zaid Alhulaybi

Department of Chemical Engineering, College of Engineering, King Faisal University, Al Ahsa 31982, Saudi Arabia

\* Correspondence: aalmithn@kfu.edu.sa

## Section S1. Details of density functional calculations of thermochemical properties

Frequency calculations were performed on gas phase molecules and all optimized adsorbed species to determine zero-point vibrational energies (ZPVE), and vibrational, translational and rotational enthalpy and free energy. These terms were then used, together with electronic energies ( $E_0$ , provided by VASP), to estimate enthalpies ( $H$ )

$$H = E_0 + \text{ZPVE} + H_{\text{vib}} + H_{\text{trans}} + H_{\text{rot}} \quad (\text{S1})$$

and free energies ( $G$ )

$$G = E_0 + \text{ZPVE} + G_{\text{vib}} + G_{\text{trans}} + G_{\text{rot}} \quad (\text{S2})$$

for reactants, products, and transition states at 593 K (the temperature at which ethane hydrogenolysis rates were measured). For calculations which include a periodic metal surface or a metal half-particle, there are no translational or rotational degrees of freedom and DFT-derived vibrational frequencies can be used to determine the ZPVE,  $H_{\text{vib}}$ , and  $G_{\text{vib}}$

$$\text{ZPVE} = \sum_i (\frac{1}{2} v_i h) \quad (\text{S3})$$

$$H_{\text{vib}} = \sum_i \left( \frac{v_i h e^{-\frac{v_i h}{kT}}}{1 - e^{-\frac{v_i h}{kT}}} \right) \quad (\text{S4})$$

$$G_{\text{vib}} = \sum_i \left( -kT \ln \frac{1}{1 - e^{-\frac{v_i h}{kT}}} \right) \quad (\text{S5})$$

For gaseous molecules, translational and rotational enthalpies and free energies were also computed from statistical mechanics:

$$H_{\text{trans}} = \frac{5}{2} kT \quad (\text{S6})$$

$$H_{\text{rot,linear}} = kT \quad (\text{S7})$$

$$H_{\text{rot,nonlinear}} = \frac{3}{2} kT \quad (\text{S8})$$

$$G_{\text{trans}} = -kT \ln \left[ \left( \frac{2\pi M kT}{h^2} \right)^{3/2} V \right] \quad (\text{S9})$$

$$G_{\text{rot}} = -kT \ln \left[ \frac{\pi^{1/2}}{\sigma} \left( \frac{T^3}{\theta_x \theta_y \theta_z} \right)^{1/2} \right] \quad (\text{S10})$$

$$\theta_i = \frac{h^2}{8\pi^2 I_i k} \quad (\text{S11})$$

where  $I_i$  is the moment of inertia about axes  $x$ ,  $y$  or  $z$  and  $\sigma$  is the symmetry number of the molecule (2 for H<sub>2</sub> and 6 for C<sub>2</sub>H<sub>6</sub>). Equations S10–S12 obtained from: McQuarrie, D. A.; Statistical Mechanics; Sausalito, CA.

**Table S1: Electronic energy, ZPVE, and vibrational, translational, and rotational enthalpy and free energy at 573 K in eV.**

| Systems                                         | E0        | ZPVE   | H(v)   | G(v)    | H(t+r) | G(t+r)  |
|-------------------------------------------------|-----------|--------|--------|---------|--------|---------|
| Ni <sub>2</sub> P(001)                          | -374.7250 | -      | -      | -       | -      | -       |
| Molecules                                       | E0        | ZPVE   | H(v)   | G(v)    | H(t+r) | G(t+r)  |
| H <sub>2</sub>                                  | -6.9767   | 0.2695 | 0.0000 | 0.0000  | 0.1728 | -0.7147 |
| CH <sub>3</sub> OH                              | -29.8848  | 1.3426 | 0.0967 | -0.1138 | 0.1975 | -1.3091 |
| H <sub>2</sub> O                                | -14.1521  | 0.5651 | 0.0038 | -0.0009 | 0.1975 | -1.0545 |
| CH <sub>2</sub> O                               | -21.8274  | 0.6979 | 0.0237 | -0.0071 | 0.1975 | -1.2303 |
| HCOOH                                           | -29.2555  | 0.8850 | 0.0766 | -0.0347 | 0.1975 | -1.3862 |
| CO                                              | -14.4495  | 0.1303 | 0.0013 | -0.0003 | 0.1728 | -1.1162 |
| CO <sub>2</sub>                                 | -22.3071  | 0.3043 | 0.0477 | -0.0249 | 0.1728 | -1.1927 |
| Adsorbates                                      | E0        | ZPVE   | H(v)   | G(v)    | H(t+r) | G(t+r)  |
| H*                                              | -378.2528 | 0.1496 | 0.0473 | -0.0233 | -      | -       |
| H <sub>2</sub> O*                               | -389.1202 | 0.6380 | 0.2282 | -0.3360 | -      | -       |
| OH*                                             | -385.3310 | 0.3513 | 0.1486 | -0.1457 | -      | -       |
| O*                                              | -381.4190 | 0.0719 | 0.0923 | -0.0996 | -      | -       |
| CH <sub>3</sub> OH*                             | -404.8598 | 1.4032 | 0.3385 | -0.4990 | -      | -       |
| CH <sub>2</sub> OH*                             | -400.4379 | 1.0812 | 0.2884 | -0.3356 | -      | -       |
| CH <sub>3</sub> O*                              | -401.0583 | 1.0886 | 0.2828 | -0.3775 | -      | -       |
| CH <sub>2</sub> O*                              | -396.8110 | 0.7664 | 0.2375 | -0.2348 | -      | -       |
| CHO*                                            | -393.1484 | 0.4751 | 0.2014 | -0.2076 | -      | -       |
| CO*                                             | -390.3079 | 0.1973 | 0.1844 | -0.2705 | -      | -       |
| H <sub>2</sub> COOH*                            | -407.6010 | 1.2269 | 0.3543 | -0.4484 | -      | -       |
| HCOOH*                                          | -404.2323 | 0.9152 | 0.3281 | -0.4703 | -      | -       |
| H <sub>2</sub> COO*                             | -403.5296 | 0.9024 | 0.2949 | -0.2996 | -      | -       |
| COOH*                                           | -400.3996 | 0.6138 | 0.2838 | -0.3285 | -      | -       |
| HCOO*                                           | -401.0206 | 0.6201 | 0.2743 | -0.3270 | -      | -       |
| CO <sub>2</sub> *                               | -397.0432 | 0.3216 | 0.2768 | -0.5108 | -      | -       |
| Transition States                               | E0        | ZPVE   | H(v)   | G(v)    | H(t+r) | G(t+r)  |
| CH <sub>3</sub> OH* → CH <sub>2</sub> OH* + H*  | -403.4980 | 1.2466 | 0.3122 | -0.3459 | -      | -       |
| CH <sub>3</sub> OH* → CH <sub>3</sub> O* + H*   | -403.6057 | 1.1898 | 0.3126 | -0.3879 | -      | -       |
| CH <sub>3</sub> O* → CH <sub>2</sub> O* + H*    | -400.1158 | 0.9330 | 0.2557 | -0.2402 | -      | -       |
| CH <sub>2</sub> OH* → CH <sub>2</sub> O* + H*   | -399.3486 | 0.8899 | 0.2647 | -0.2493 | -      | -       |
| CH <sub>2</sub> O* → CHO* + H*                  | -396.4811 | 0.6318 | 0.2161 | -0.2037 | -      | -       |
| CHO* → CO* + H*                                 | -392.8491 | 0.4041 | 0.1929 | -0.2490 | -      | -       |
| CH <sub>2</sub> O* + OH* → H <sub>2</sub> COOH* | -407.1829 | 1.0881 | 0.3852 | -0.4852 | -      | -       |
| H <sub>2</sub> COOH* → H <sub>2</sub> COO* + H* | -406.3670 | 1.0025 | 0.3283 | -0.3288 | -      | -       |
| H <sub>2</sub> COOH* → HCOOH* + H*              | -407.0400 | 1.0635 | 0.3413 | -0.3910 | -      | -       |

**Table S1 Cont.: Electronic energy, ZPVE, and vibrational, translational, and rotational enthalpy and free energy at 573 K in eV.**

| Transition States                                                                   | E0        | ZPVE   | H(v)   | G(v)    | H(t+r) | G(t+r) |
|-------------------------------------------------------------------------------------|-----------|--------|--------|---------|--------|--------|
| $\text{HCOOH}^* \rightarrow \text{COOH}^* + \text{H}^*$                             | -403.2116 | 0.7642 | 0.3123 | -0.3503 | -      | -      |
| $\text{COOH}^* \rightarrow \text{CO}_2^* + \text{H}^*$                              | -398.9983 | 0.3796 | 0.2995 | -0.3952 | -      | -      |
| $\text{H}_2\text{COO}^* \rightarrow \text{HCOO}^* + \text{H}^*$                     | -403.0493 | 0.7583 | 0.2788 | -0.2561 | -      | -      |
| $\text{HCOOH}^* \rightarrow \text{HCOO}^* + \text{H}^*$                             | -403.4608 | 0.7508 | 0.3193 | -0.4412 | -      | -      |
| $\text{HCOO}^* \rightarrow \text{CO}_2^* + \text{H}^*$                              | -399.7838 | 0.4441 | 0.2940 | -0.4048 | -      | -      |
| $\text{H}_2\text{O}^* \rightarrow \text{H}^* + \text{OH}^*$                         | -387.9242 | 0.4647 | 0.1749 | -0.1519 | -      | -      |
| $\text{OH}^* \rightarrow \text{O}^* + \text{H}^*$                                   | -383.4783 | 0.1915 | 0.1293 | -0.1160 | -      | -      |
| $\text{OH}^* + \text{OH}^* \rightarrow \text{H}_2\text{O}^* + \text{O}^*$           | -395.1121 | 0.7023 | 0.2508 | -0.2667 | -      | -      |
| $2\text{H}_2\text{O}^* \rightarrow \text{H}_2\text{O}^* + \text{OH}^* + \text{H}^*$ | -402.6465 | 1.1248 | 0.3614 | -0.3771 | -      | -      |
| $\text{CO}^* + \text{OH}^* \rightarrow \text{COOH}^*$                               | -400.1592 | 0.5467 | 0.2842 | -0.3471 | -      | -      |
| $\text{CO}^* + \text{O}^* \rightarrow \text{CO}_2^*$                                | -395.6368 | 0.2586 | 0.2243 | -0.2658 | -      | -      |

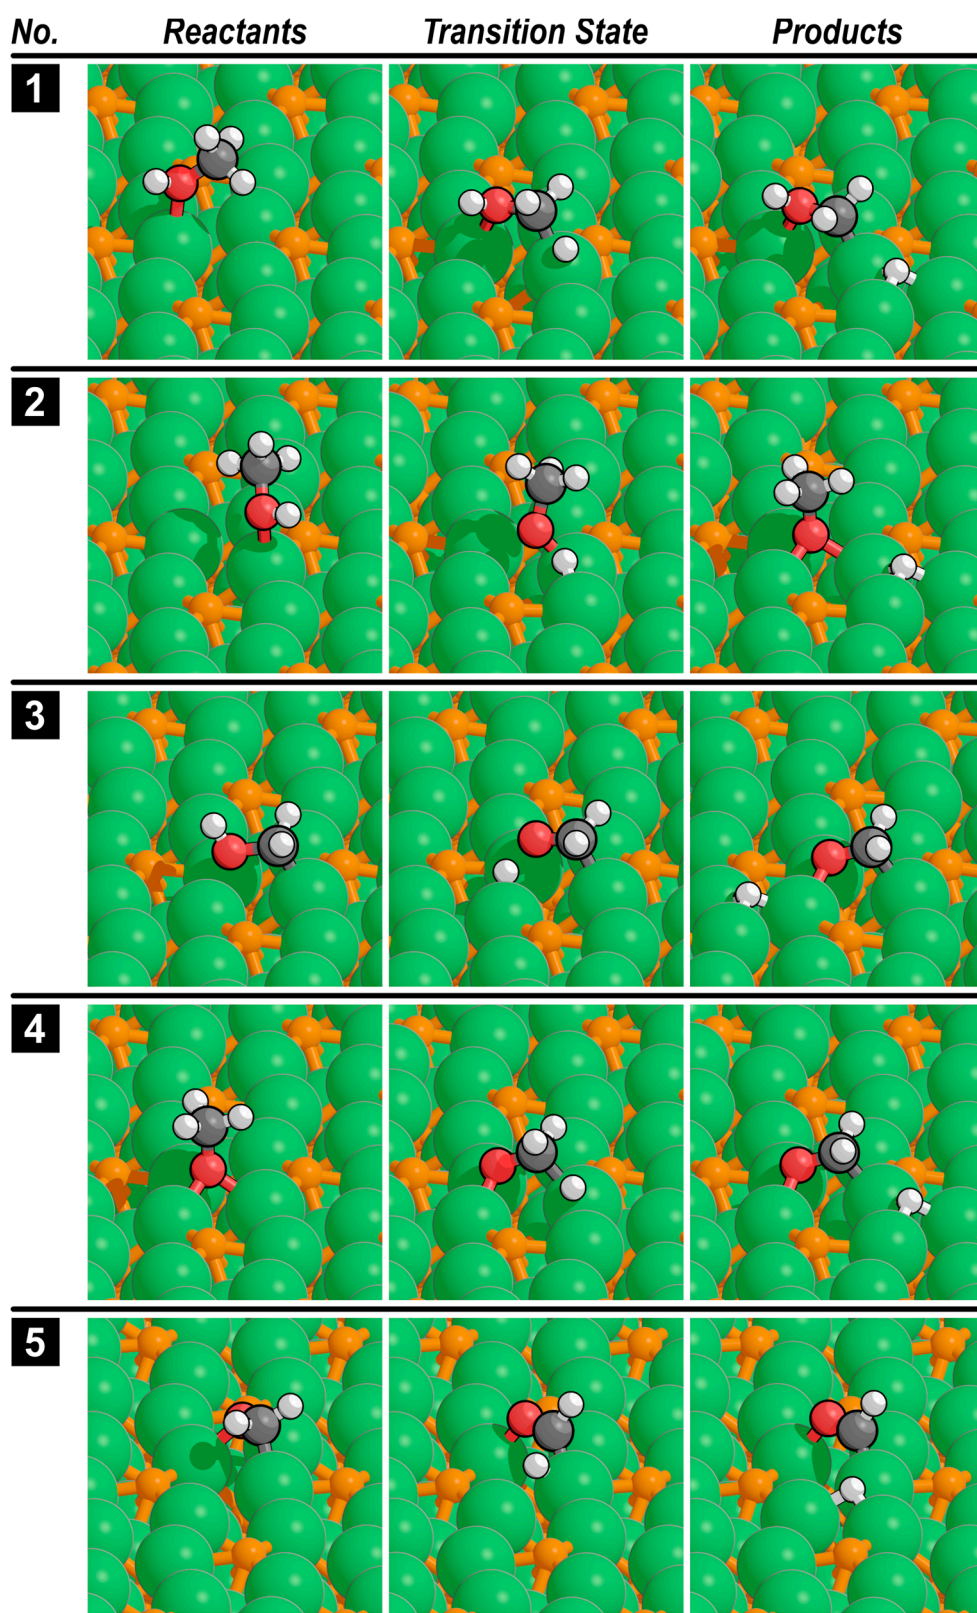

Figure S1. Reactants, transition state, and products structures for all reactions listed on Table 2.

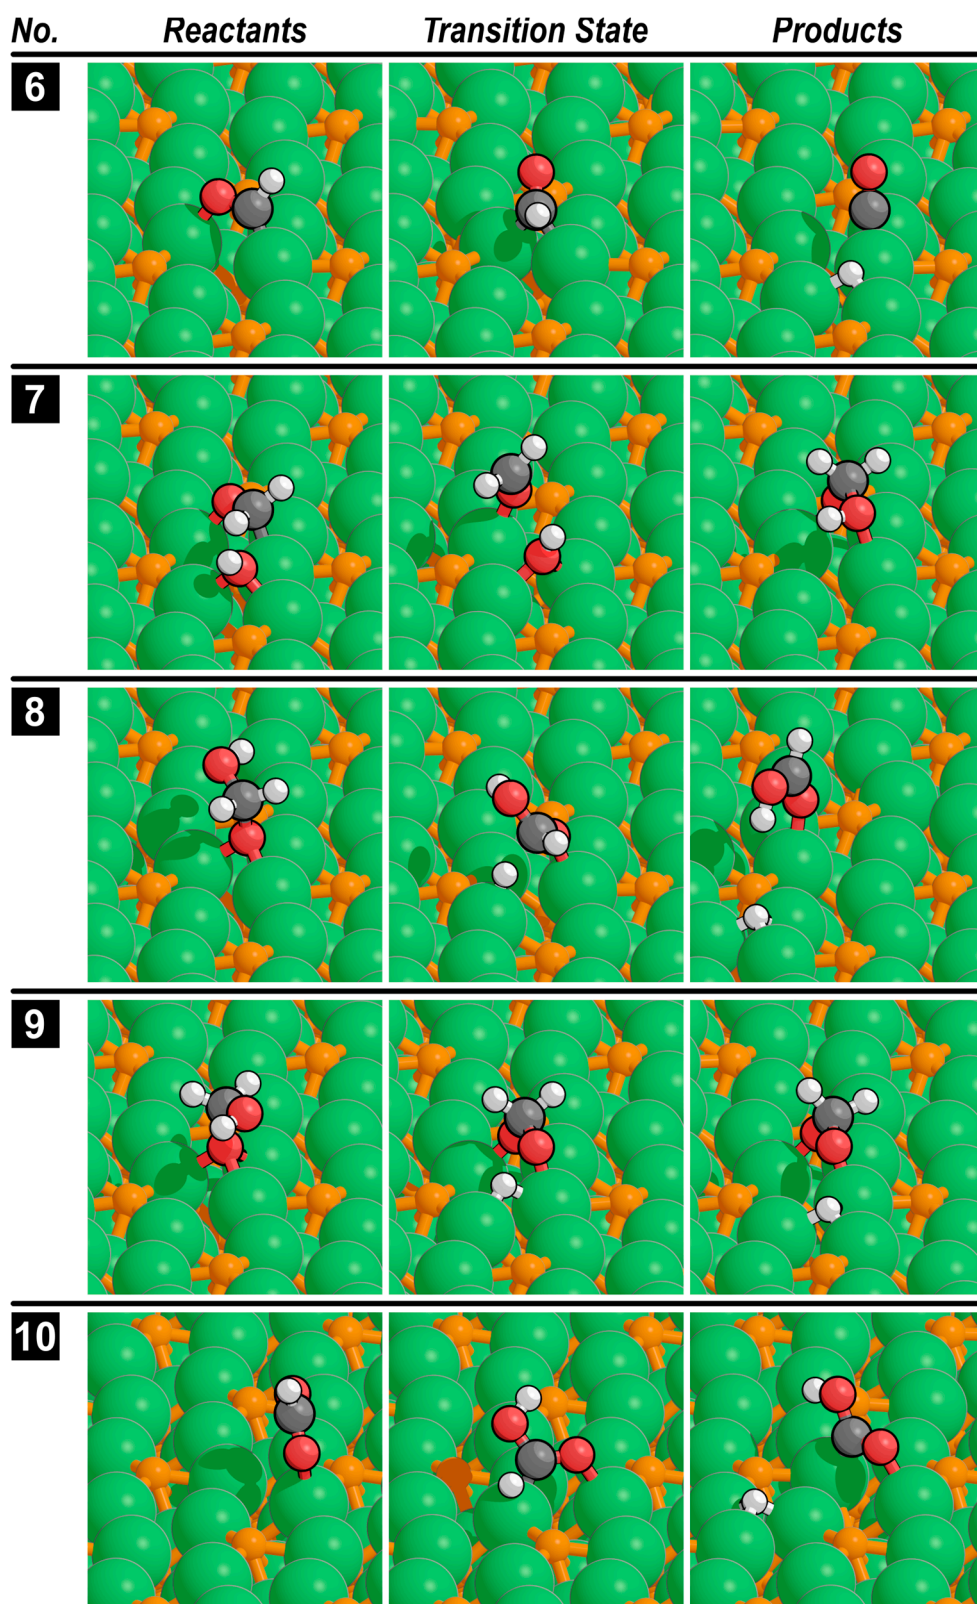

**Figure S1 Cont.** Reactants, transition state, and products structures for all reactions listed on Table 2.

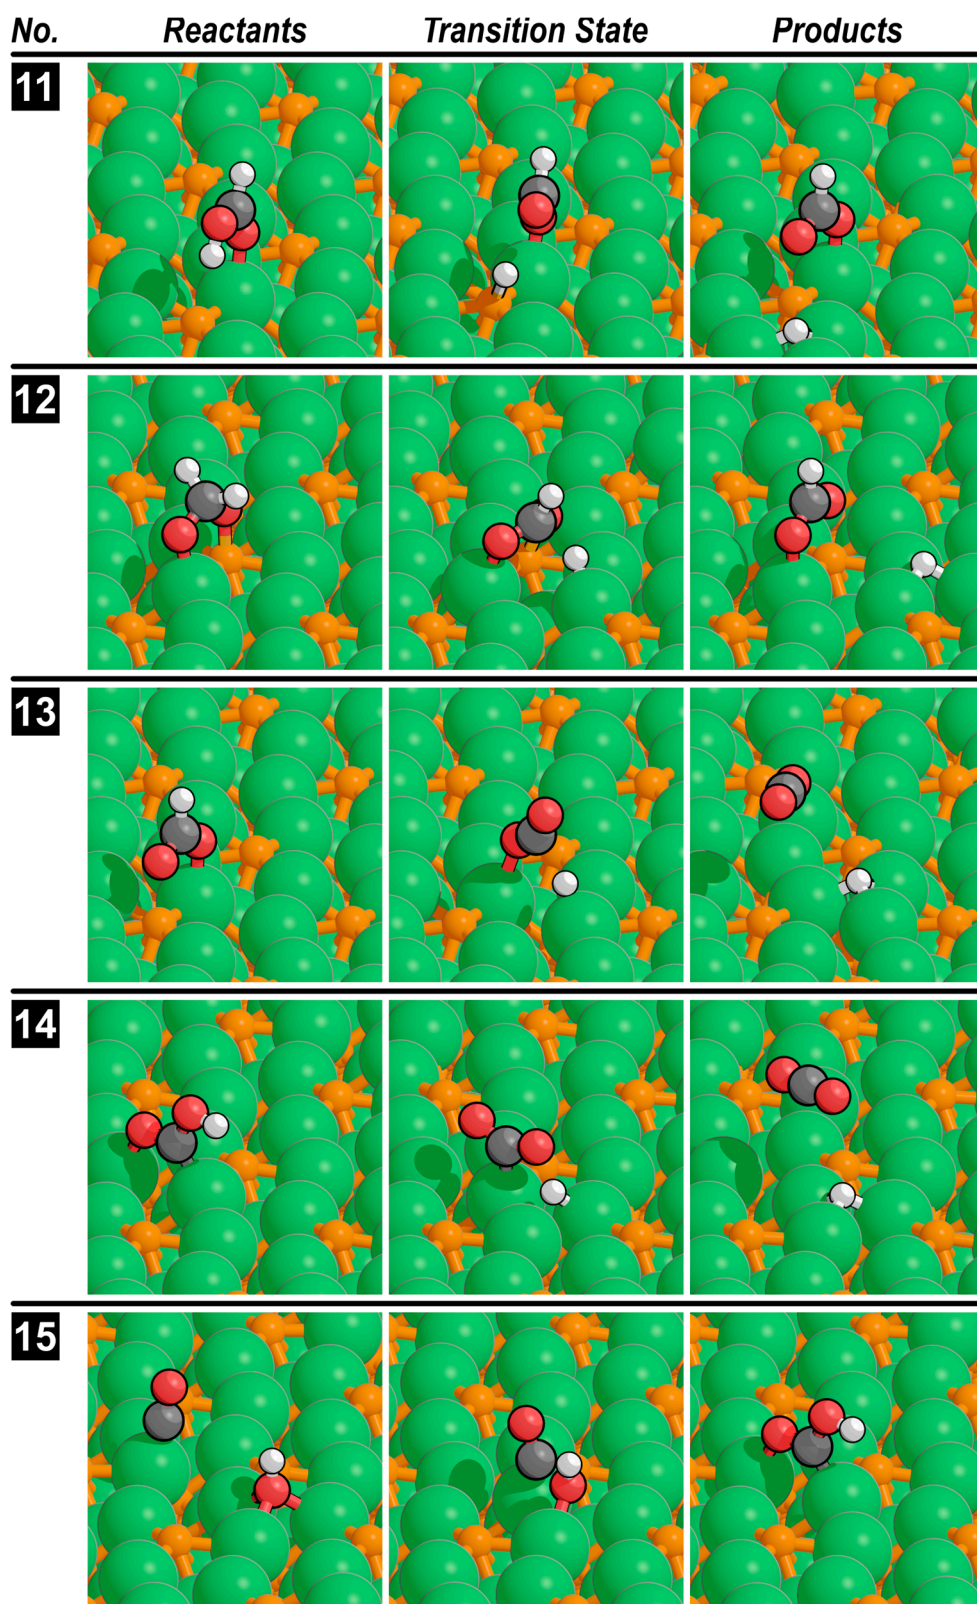

Figure S1 Cont. Reactants, transition state, and products structures for all reactions listed on Table 2.

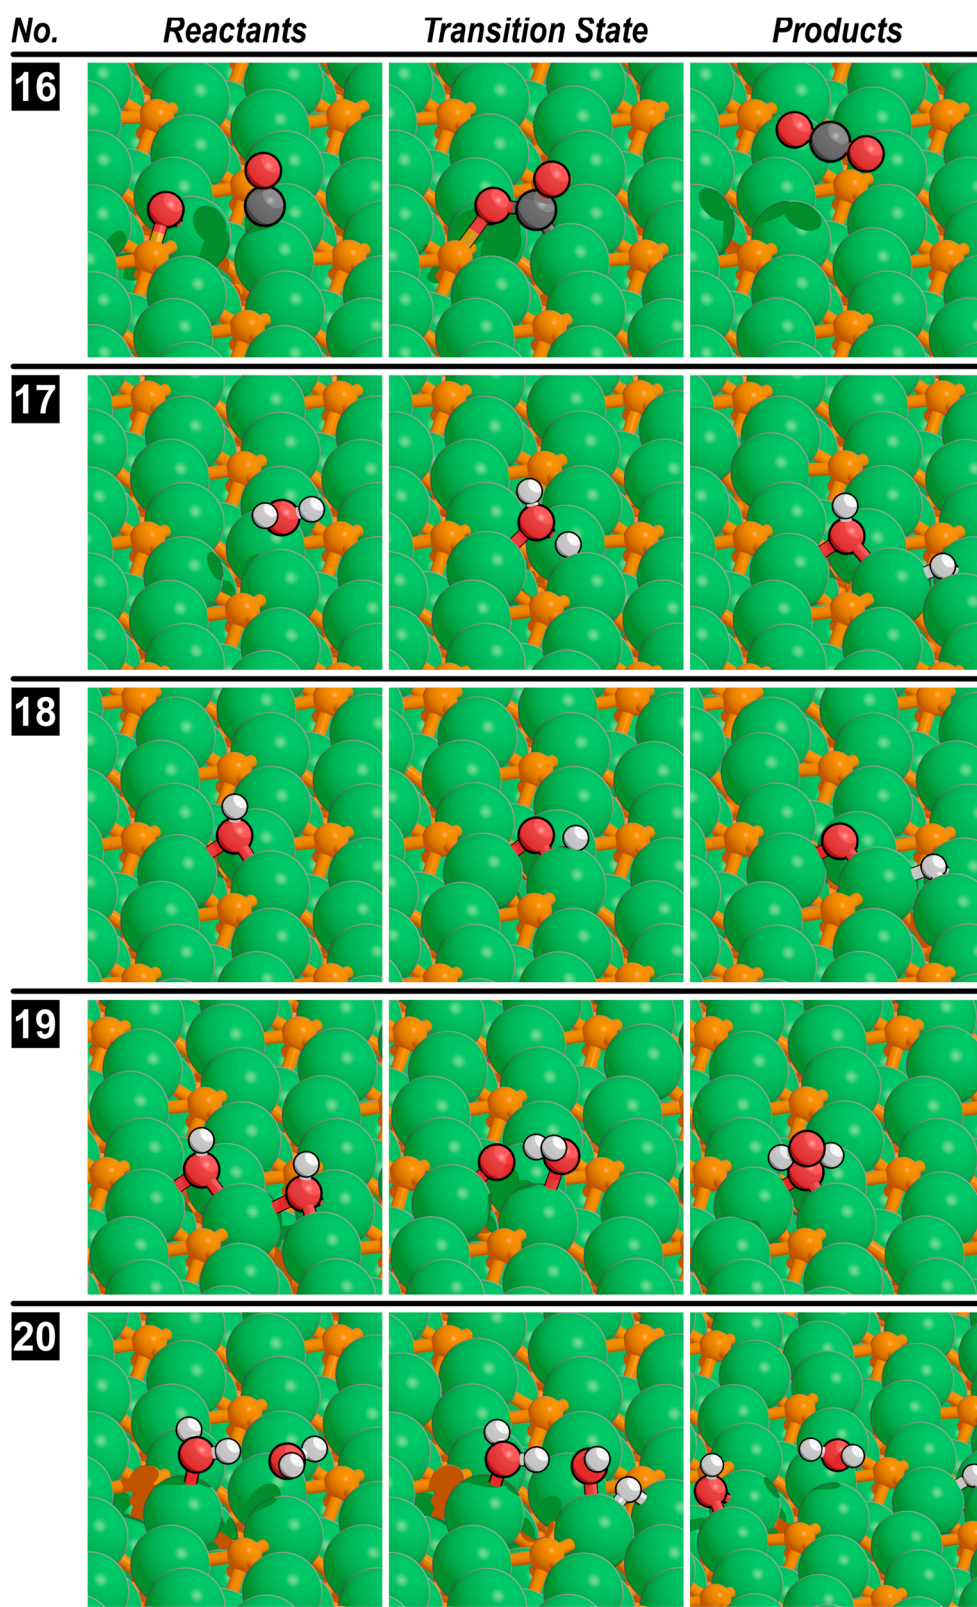

**Figure S1 Cont.** Reactants, transition state, and products structures for all reactions listed on Table 2.
